# Supplementary material for: Macrophage-Mediated Bone Formation in Scaffolds Modified With MSC-Derived Extracellular Matrix Is Dependent on the Migration Inhibitory Factor Signaling Pathway
Source: PubMed Central journal article supplement (PMC8490662; doi:10.3389/fcell.2021.714011), 2021-09-21
Supplement: Data_Sheet_1.pdf [file Data_Sheet_1.pdf]

# Supplemental Figure 1

DBM scaffolds

EDS images

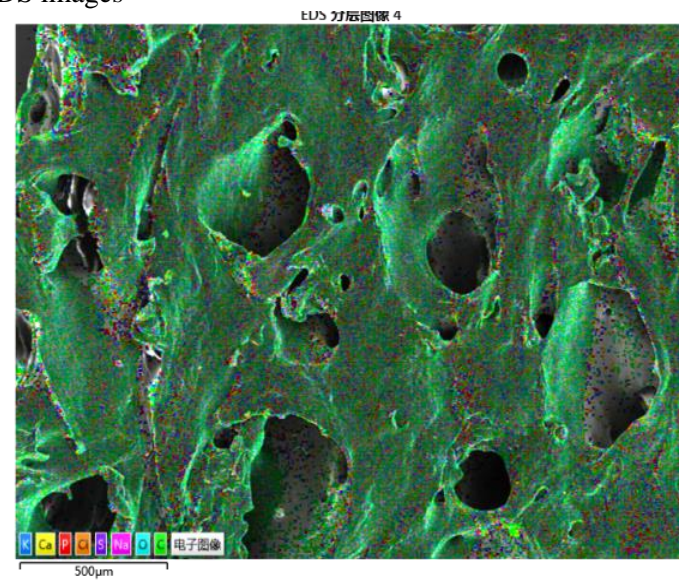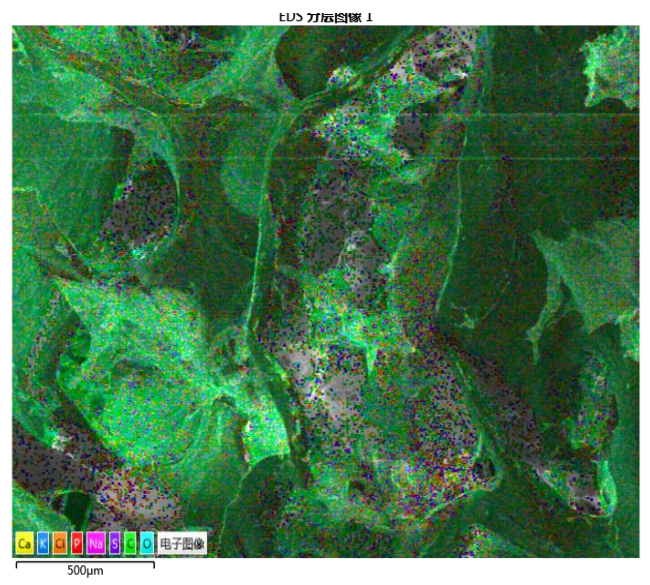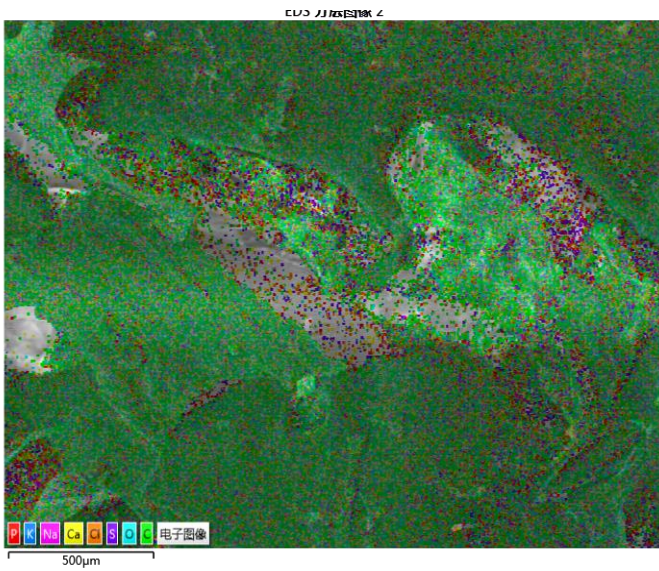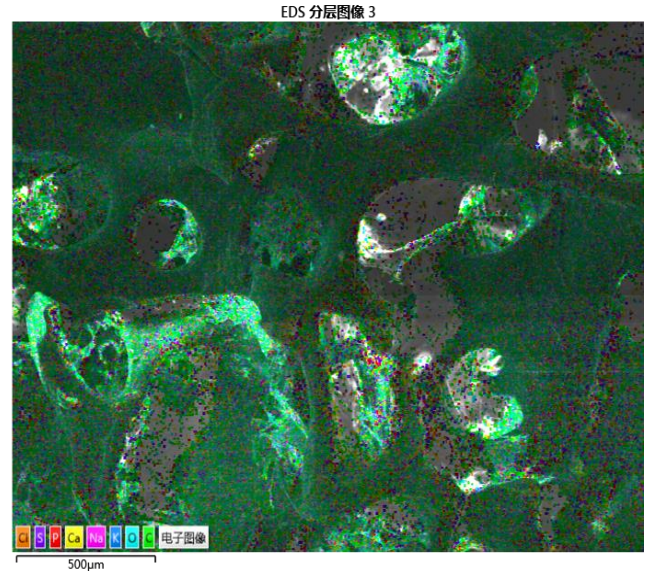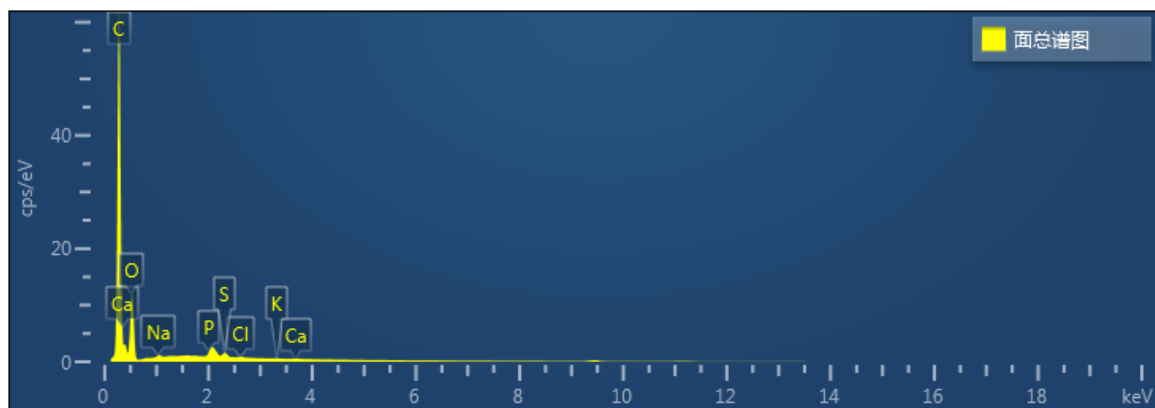

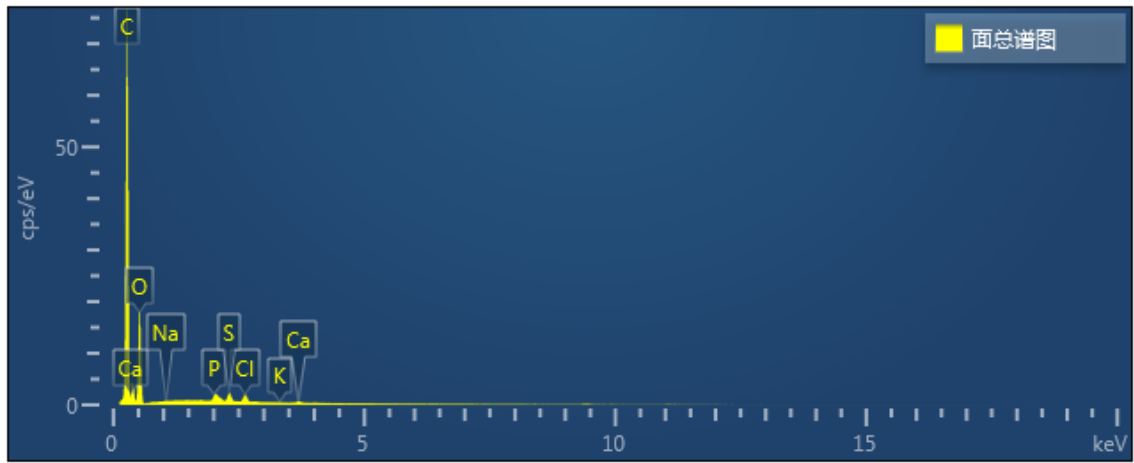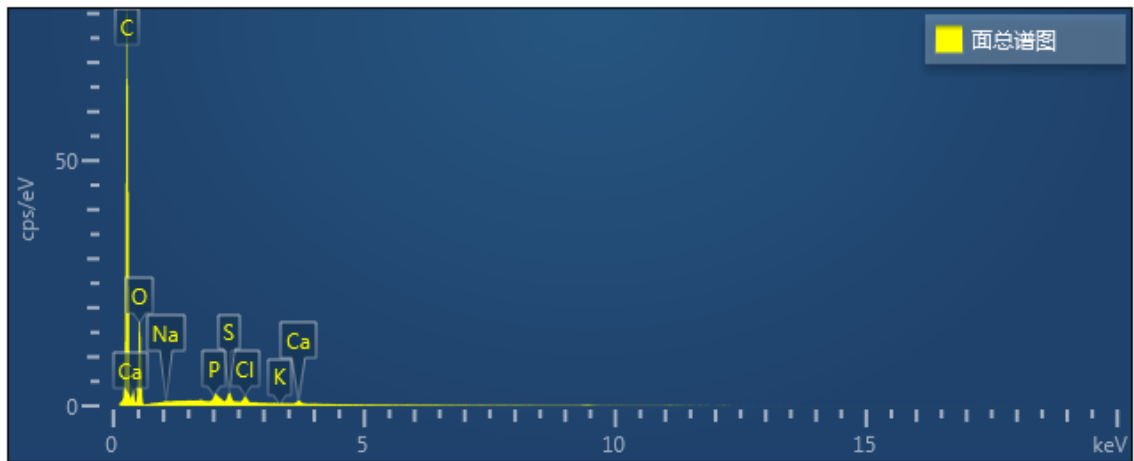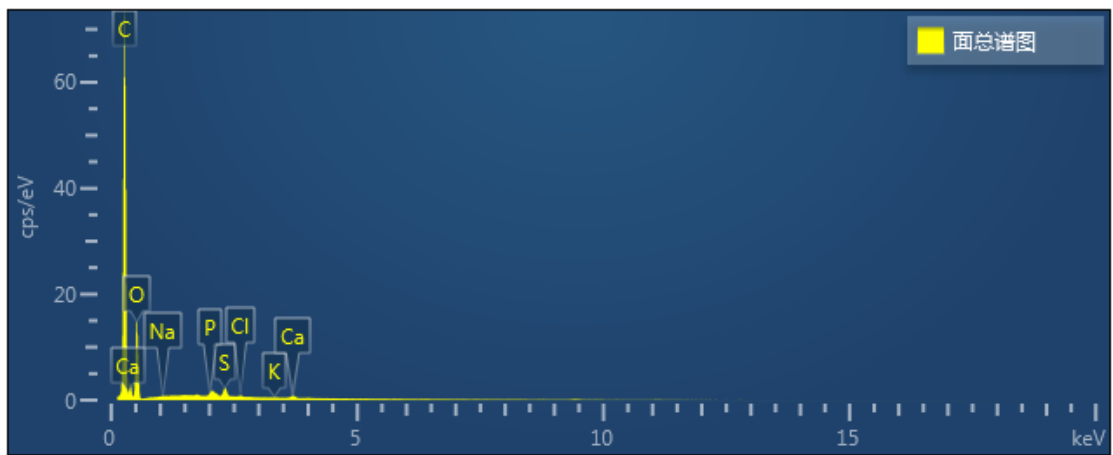

### The elemental distribution of scaffolds

| Element | Atomic perce of DBM scaffolds (%) | Element | Atomic perce of DBM scaffolds (%) | Element | Atomic perce of DBM scaffolds (%) | Element | Atomic perce of DBM scaffolds (%) |
|---------|-----------------------------------|---------|-----------------------------------|---------|-----------------------------------|---------|-----------------------------------|
| C       | 79.32                             | C       | 78.92                             | C       | 79.86                             | C       | 80.16                             |
| O       | 20.5                              | O       | 20.78                             | O       | 19.8                              | O       | 19.62                             |
| Na      | 0.07                              | Na      | 0.01                              | Na      | 0.02                              | Na      | 0.01                              |
| P       | 0                                 | P       | 0.05                              | P       | 0.05                              | P       | 0.02                              |
| S       | 0.07                              | S       | 0.12                              | S       | 0.14                              | S       | 0.13                              |
| Cl      | 0.02                              | Cl      | 0.1                               | Cl      | 0.09                              | Cl      | 0.02                              |
| K       | 0.01                              | K       | 0                                 | K       | 0                                 | K       | 0                                 |
| Ca      | 0.01                              | Ca      | 0.02                              | Ca      | 0.05                              | Ca      | 0.04                              |
| Total:  | 100                               | Total:  | 100                               | Total:  | 100                               | Total:  | 100                               |

### DBM-ECM scaffolds

EDS images

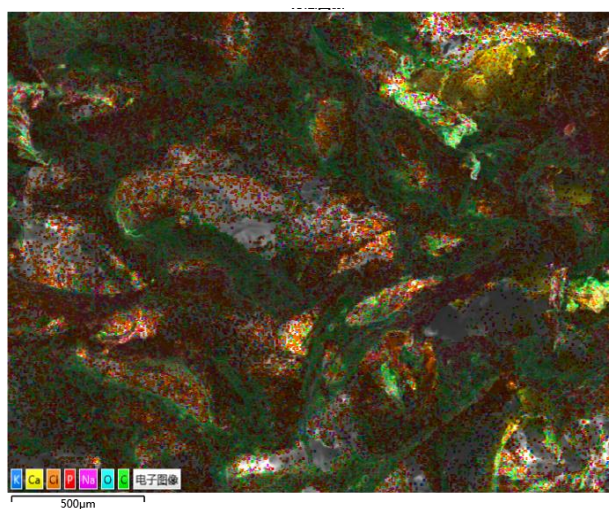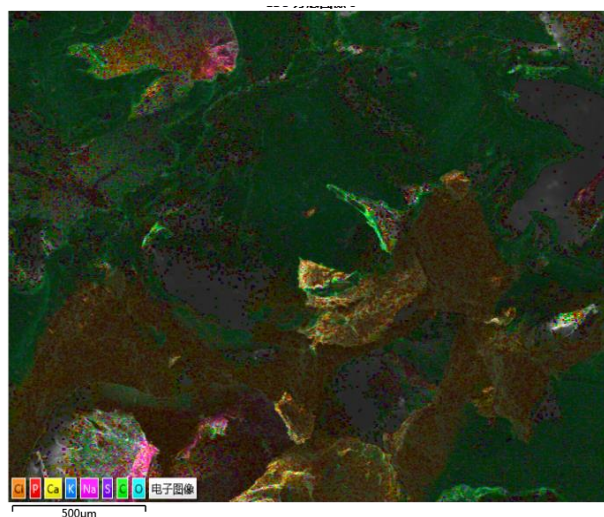

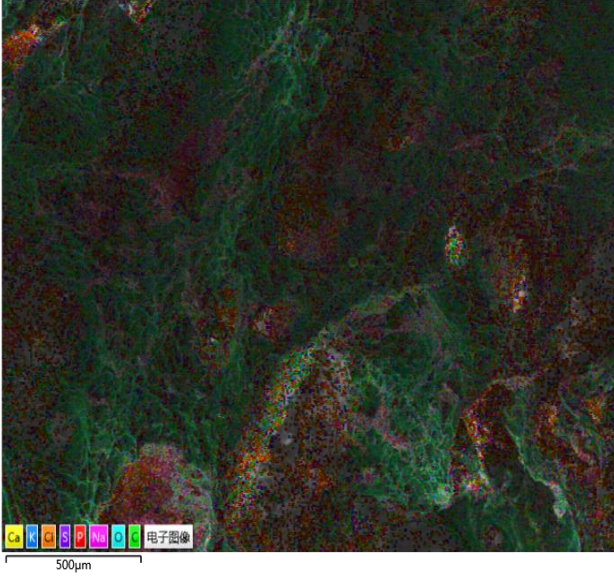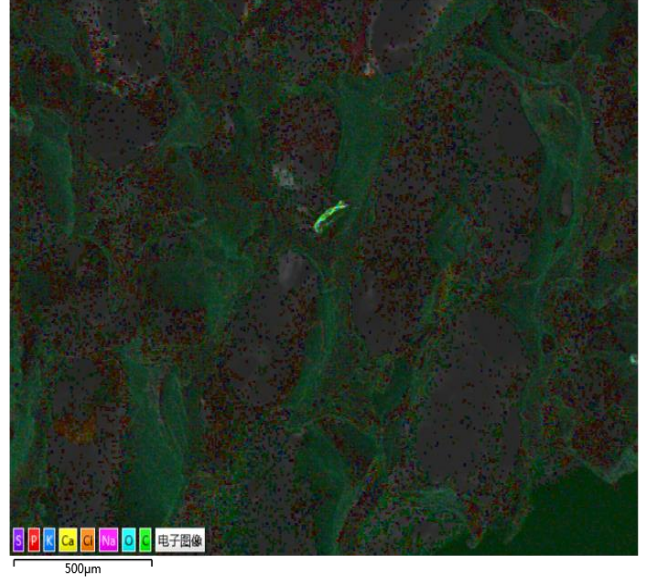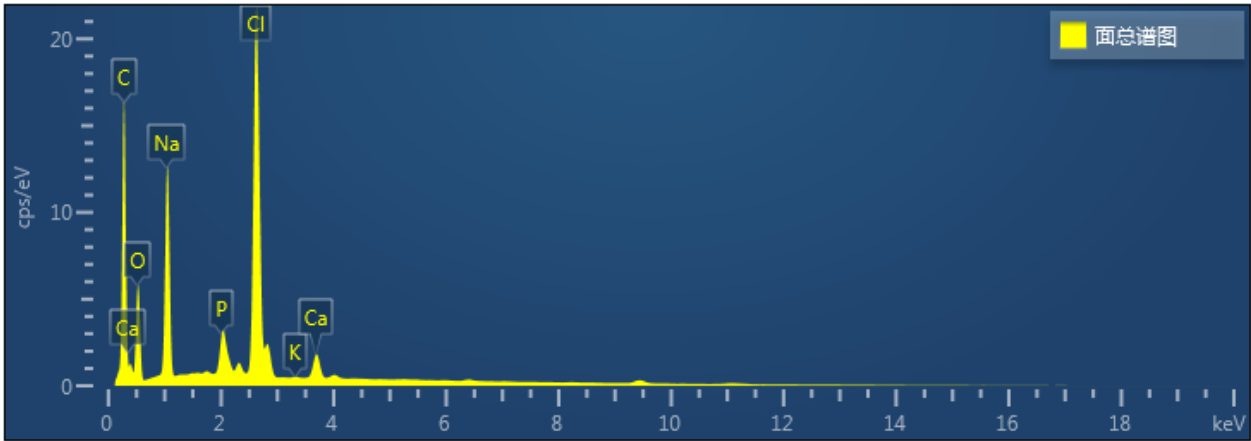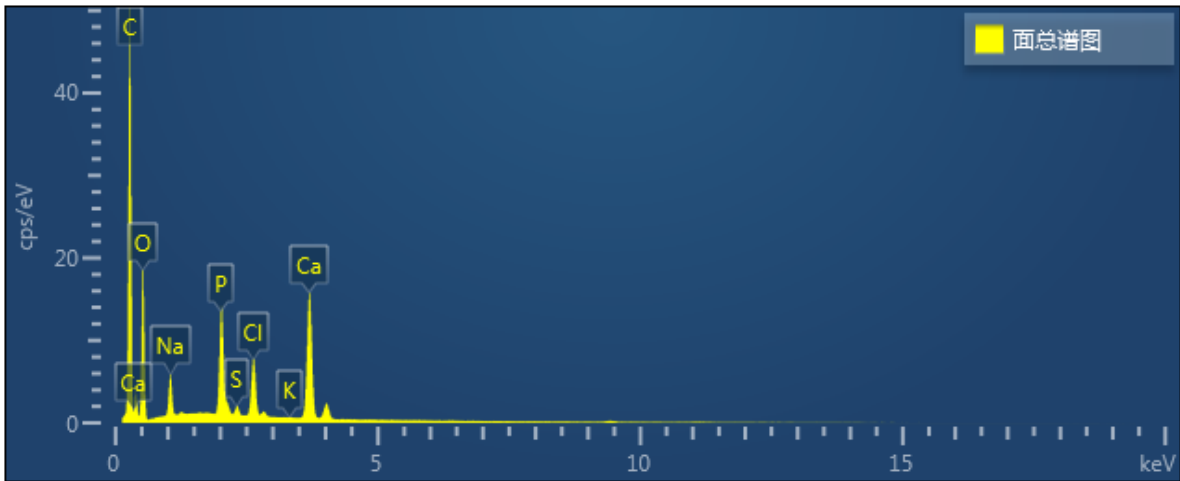

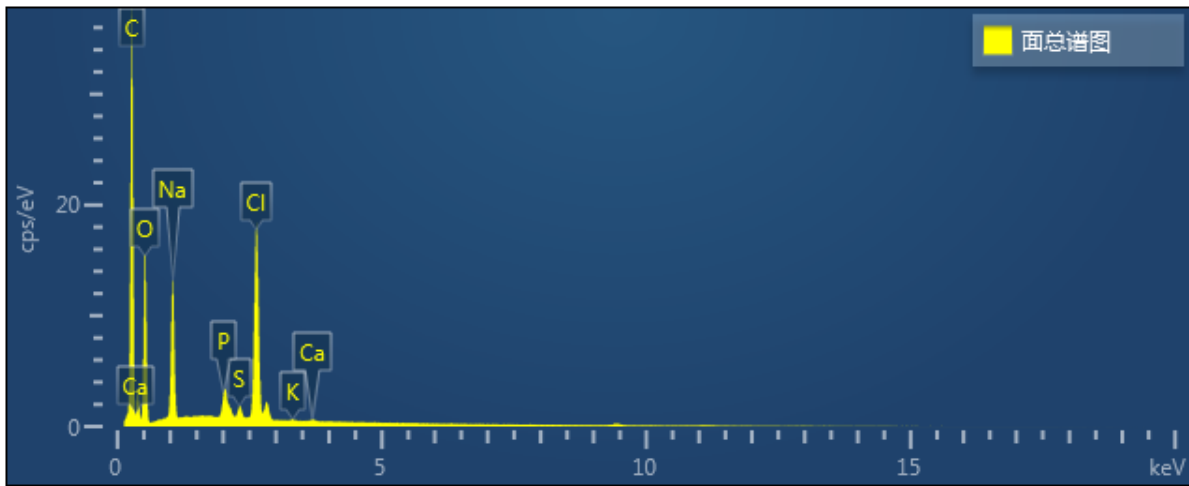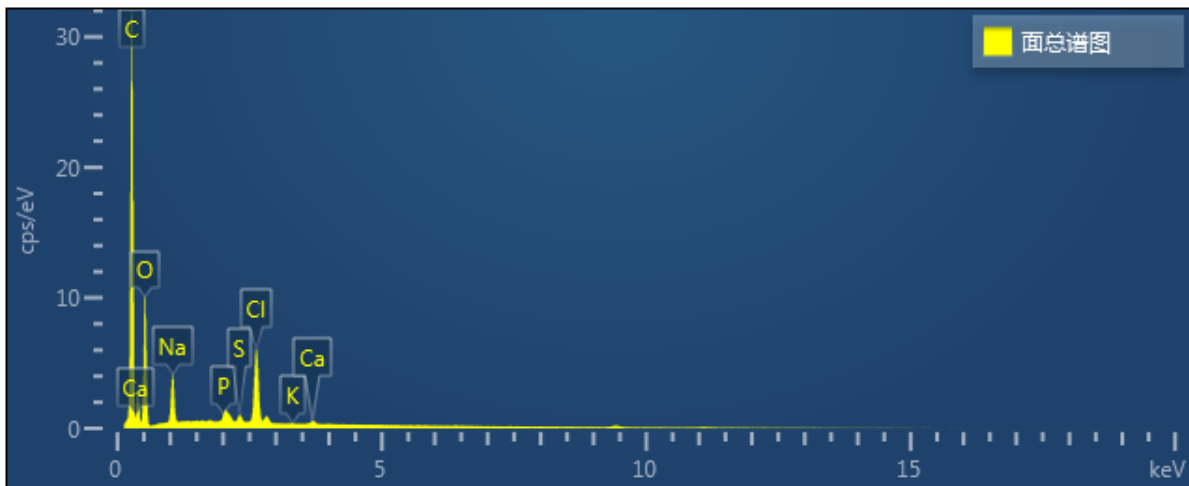

The elemental distribution of scaffolds

| Element | Atomic perce of DBM-ECM scaffolds (%) | Element | Atomic perce of DBM-ECM scaffolds (%) | Element | Atomic perce of DBM-ECM scaffolds (%) | Element | Atomic perce of DBM-ECM scaffolds (%) |
|---------|---------------------------------------|---------|---------------------------------------|---------|---------------------------------------|---------|---------------------------------------|
| C       | 79.33                                 | C       | 75.07                                 | C       | 76.76                                 | C       | 77.77                                 |
| O       | 14.2                                  | O       | 21.36                                 | O       | 19.61                                 | O       | 20.4                                  |
| Na      | 3.03                                  | Na      | 0.73                                  | Na      | 1.95                                  | Na      | 0.93                                  |
| P       | 0.21                                  | P       | 0.82                                  | P       | 0.13                                  | P       | 0.04                                  |
| S       | 0                                     | S       | 0.08                                  | S       | 0.09                                  | S       | 0.07                                  |
| Cl      | 2.96                                  | Cl      | 0.52                                  | Cl      | 1.42                                  | Cl      | 0.75                                  |
| K       | 0.01                                  | K       | 0                                     | K       | 0.01                                  | K       | 0                                     |
| Ca      | 0.26                                  | Ca      | 1.41                                  | Ca      | 0.02                                  | Ca      | 0.04                                  |
| Total:  | 100                                   | Total:  | 100                                   | Total:  | 100                                   | Total:  | 100                                   |

The paired T-tests was used for the analysis for difference for each element between DBM and DBM-ECM groups. The P values for distribution of C, O, Na, P, S, Cl, K and Ca in DBM and DBM-ECM scaffolds were 0.0466, 0.04584, 0.0218, 0.1744, 0.0447, 0.0496, 0.2070 and 0.2712.
